# Supplementary material
Source: publisher figshare collection journal article supplement (https://tandf.figshare.com/articles/dataset/_/21557727)
Supplement: Supplementary file 1 [file 1]

| Table Analyzed | BDNF |
| --- | --- |
|  |  |
| P value and statistical significance |  |
| Test | Chi-square |
| Chi-square, df | 207.1, 88 |
| P value | <0.0001 |
| P value summary | **** |
| One- or two-sided | NA |
| Statistically significant (P < 0.05)? | Yes |
|  |  |
| Data analyzed |  |
| Number of rows | 45 |
| Number of columns | 3 |

**Supplementary Table 2**

Analysis results of 4 genes BDNF, SLC6A4, NR3C1, and FKBP5 with GraphPad Prism 8.4.3 (La Jolla, California, USA) software and Chi-square statistical test with 95% confidence intervals (CIs).

| Table Analyzed | FKBP5 |
| --- | --- |
|  |  |
| P value and statistical significance |  |
| Test | Chi-square |
| Chi-square, df | 356.3, 88 |
| P value | <0.0001 |
| P value summary | **** |
| One- or two-sided | NA |
| Statistically significant (P < 0.05)? | Yes |
|  |  |
| Data analyzed |  |
| Number of rows | 45 |
| Number of columns | 3 |

| Table Analyzed | NR3C1 |
| --- | --- |
|  |  |
| P value and statistical significance |  |
| Test | Chi-square |
| Chi-square, df | 186.0, 88 |
| P value | <0.0001 |
| P value summary | **** |
| One- or two-sided | NA |
| Statistically significant (P < 0.05)? | Yes |
|  |  |
| Data analyzed |  |
| Number of rows | 45 |
| Number of columns | 3 |

| Table Analyzed | SLC6A4 |
| --- | --- |
|  |  |
| P value and statistical significance |  |
| Test | Chi-square |
| Chi-square, df | 159.9, 88 |
| P value | <0.0001 |
| P value summary | **** |
| One- or two-sided | NA |
| Statistically significant (P < 0.05)? | Yes |
|  |  |
| Data analyzed |  |
| Number of rows | 45 |
| Number of columns | 3 |
